# Supplementary material for: Pentatricopeptide repeat protein MID1 modulates nad2 intron 1 splicing and Arabidopsis development
Source: PubMed Central journal article supplement (PMC7005036; doi:10.1038/s41598-020-58495-5), 2020-02-06
Supplement: 41598_2020_58495_MOESM1_ESM.pdf [file 41598_2020_58495_MOESM1_ESM.pdf]

# **Pentatricopeptide repeat protein MID1 modulates *nad2* intron 1 splicing and *Arabidopsis* development**

Peng Zhao<sup>1,2</sup>, Fang Wang<sup>1,2</sup>, Na Li<sup>1</sup>, Dong-Qiao Shi<sup>1</sup> & Wei-Cai Yang<sup>1,\*</sup>

<sup>1</sup>State Key Laboratory of Molecular and Developmental Biology, Institute of Genetics and Developmental Biology, Chinese Academy of Sciences, Beijing 100101, and University of Chinese Academy of Sciences, Yuquan Road, Beijing 10049, China

<sup>2</sup> These authors contributed equally to the article.

\*Corresponding author: [wcyang@genetics.ac.cn](mailto:wcyang@genetics.ac.cn).

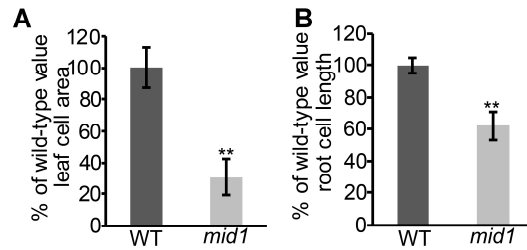

**Supplemental Figure 1** The cell expansion deficiency of *mid1*.

(A) The fifth leaf cell area of wild-type and *mid1*. Data are the mean  $\pm$  SE, n=100. Student's t tests, \*\*P<0.01. (B) The cell length of wild-type and *mid1* in the root maturation region. Data are the mean  $\pm$  SE; n=50. Student's t tests, \*\*P<0.01.



*mid1-2* M A I R L T H L R K P L A Y S R S F  
 GAT GTC TGC ATT CCG TTT TTC CGG TCA ATC TCG TCC TTT GAA GCG GTT GAA AAG 108bp  
 WT D V C I P F F R S I S S F E A V E K  
 GAT GTC TGC ATT CCG TTT TTC CGG TCA ATC TCG TCC TTT GAA GCG GTT GAA AAA  
*mid1-2* D V C I P F F R S I S S F E A V E K  
 GCG ATA AAA TGT GCT GTT GAA ACA AAG GAG TAT CTT AGA ATC  
 WT A I K C A V E T K E Y L R I -----  
*mid1-2* GGC GAT AAA ATG TGC TGT TGA AAC AAA GGA GTA TCT TAG AAT  
 G D K M C C \*

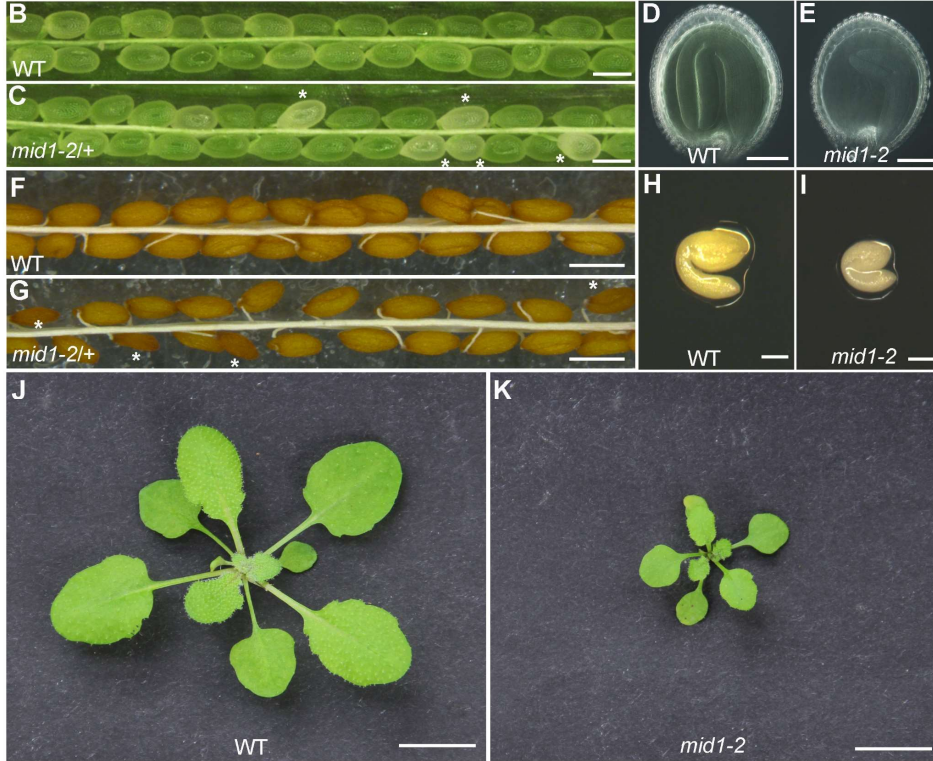

**Supplemental Figure 3** Phenotypes of *mid1-2*

**(A)** CRISPR–Cas9-induced mutation in *mid1-2*. The rectangle marks the target sequence. The red A indicates the nucleoside inserted in *mid1-2* and a premature stop codon was created after six amino acid. The truncated MID1 in *mid1-2* is 42 amino acid in length. **(B)-(C)** Seed set of wild-type and *mid1-2/+* siliques at 9 DPP. Wild-type shows a full seed set while approximately one-quarter of ovules in the *mid1-2/+* silique are abnormal. Asterisks indicate the *mid1-2* ovules. **(D)-(E)** Whole-mounted ovules from silique of *mid1-2/+* plant in **(C)**. **(F)-(G)** Seeds in the mature silique of wild-type and *mid1-2/+*. Compared to the wild-type, about one-quarter of the seeds in *mid1-2/+* display shrunken morphology. Asterisks indicate the *mid1* seeds. **(H)-(I)** Embryos dissected from *mid1-2/+* plant in **(G)**. **(J)** 4-week-old wild-type plant at short day condition. **(K)** 4-week-old *mid1-2* plant at short day condition.

**(B), (C), (F), (G)**, Bars=200 $\mu$ m. **(D), (E), (H), (I)**, Bars=50 $\mu$ m. **(J), (K)**, Bars=1cm.

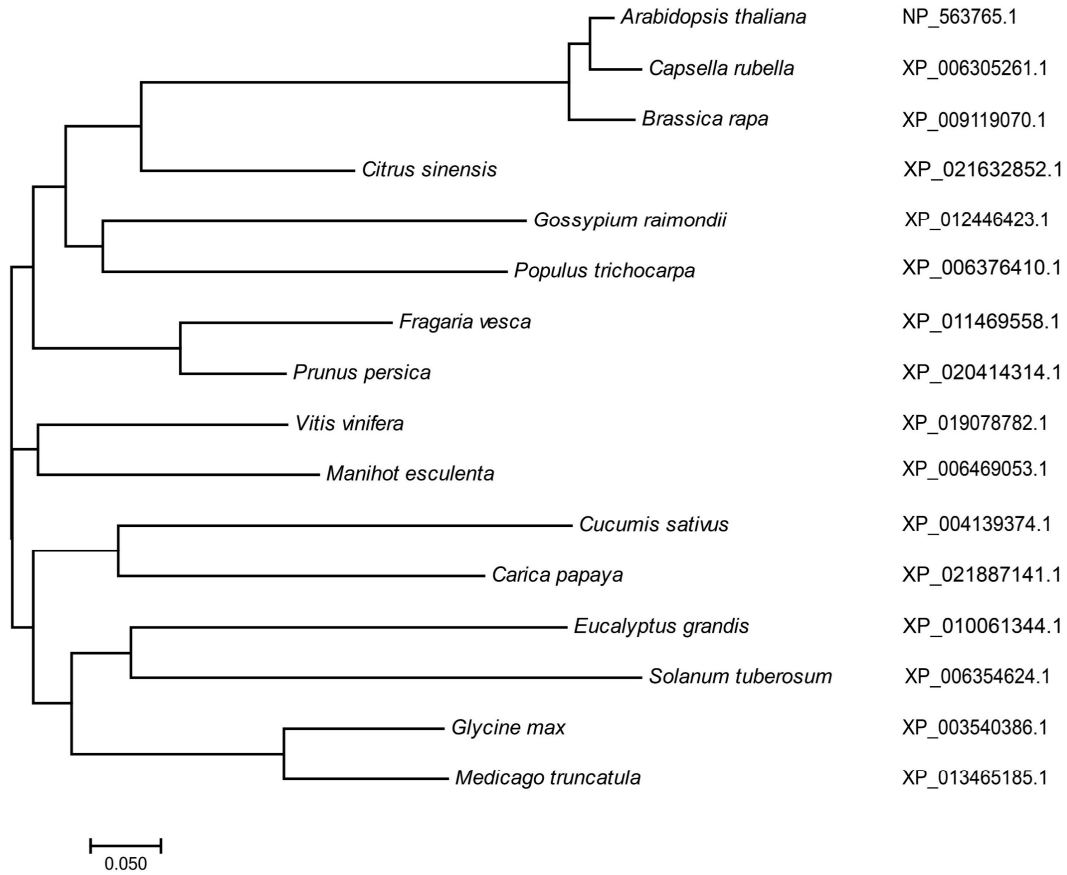

#### Supplemental Figure 4 Phylogenetic analysis of MID1 orthologues

The MID1 orthologues protein sequences of sixteen species are derived from NCBI (<https://www.ncbi.nlm.nih.gov/>). They are aligned to generate the maximum-likelihood phylogenetic tree using MEGA6. The gene locus or GenBank/EMBL accession numbers of these orthologues are listed in the right panel. Branch length represents substitutions per site.

*A.thaliana* 1 -----M A R L T H R K P L A Y S R F D V C I P F F R S I S - S F E A V E K A I R C A V E T R E Y L R I P E L V V S L K E - P Y Q N S T L F S F L S A F Q R H H R I R V I D E I L L O  
*C.rubella* 1 -----M A R L T H R K P L A Y S R F P D T C I P F F R S I S - S F E A V E K A I R C A V E T R E Y L R I P E L V V S L K E - P Y Q N S M L F S F L S A F H H H H R I R V I D E I L L O  
*B.rapa* 1 -----M A R F P H R K P L A Y S P S R - S I P F S R O V S - S F E A V E K A I R C A V E T R E Y L Q I E R L V V S L K E - P Y Q N S K L F S F L S A F H H H H R I R V I D E I L L O  
*C.sinensis* 1 -----M H G A I S C R S V N R P C I L Q S S L S R S M S - S L R T E F T V R A V D A K M Q C L P E L S G E F E E A C Q N P F S L S F Q R H H R I R V I D E I L L O  
*C.raimondii* 1 -----M A R P R K C H S F M L Y P C S Q F V L V S V S - S L N A V E S V T K A A L S A V Q L P M H V L A L E K - S R I Q N P F S L S F L S L R K R V I D E I L L O  
*P.trichocarpa* 1 -----M T L A K L I S R S L P Y S I L L Q R T L - - S - S H T P E E T L K A A V E C R S Y S K F P D L F D S F K O - S N N I P S F S P L S T F F N L R T Q V I D E I L L O  
*F.vesca* 1 -----M A T V S A K I C R Y L P L N C C V K Y H S I N S T A - - F S H A O E T V R N A V E A K A V Q D I P D L L S F E Q - A C Q N P F S F L S T F F H R M - Q V V O E I L L O  
*P.persica* 1 -----M A T R A A K F C R S F L P L H C R L L O Y C S I Y S I S - S S Q M Q E T I R N A V E A K T Y Q K I P D L L S S A Q - A C Q N P F S F L S F F H N R T Q V I D E I L L O  
*V.vinifera* 1 -----M A T G A T K L C R S F H H Y H S I R O I S S I S H I T - S S Q T L E S I K A A V E S K A V Q K I P D L L S L E E - T C N P N P F S F L S T F S Q N D R T Q V I D E I L L O  
*M.esculenta* 1 -----M L G V T R M C S S P R H H F V L O P L V R S I S I - S - - L E O T R K A V E A R A V Q E I P D L F S Y R G E Y F E N P F S F L S F S Q N D R T Q V I D E I L L O  
*C.sativus* 1 -----M H G R K T S A F L L M H H F Q C Y S S I S I S I - F S Q T Q D S I K A A V E S R S Y K K L D P L F P S L Q E - A C H N P F S F L S T F F H R M Q N D R T Q V I D E I L L O  
*C.paraya* 1 -----M S V P G S S F - - K P F S S F L P L N V C S I S A F H A V E T R A A V S R R V S Q I P D L L S Q S - S G R N P F L P L S F S Q L R R T Q I D E I L L O  
*E.grandis* 1 -----M T G A K Q Y P S R H L S S L V N F S P V R S V S - S L O S E S E K A A H Q A R N V O H I P D L L S S Q D - - E N P R I L S L S F D F P R N R T Q I D E I L L O  
*S.tuberosum* 1 -----M T V A - - - - K P H S - - - - V R P L C R S I S A R M L E S I K A V E D R R V Q I P D L L S S E G - F H R S N P F S F L S T F F E N T S V K I V O I D E I L L O  
*G.max* 1 -----M V M A M H Y R F L C R P I N R C P L G R S V S - S L Q N L E Q A V R A V E A K N Y I K I P E L L S S - D - A C Q I S N P F S F S F S F Q N I Q V I D E I L L O  
*M.truncatula* 1 M L Q Y S I S S R A T R A M Y R S V L H F S I P N Q V P S V R S V S - S P Q N V Q A V R A V E S K N V V R I P D L L T E L S - Q S Q N P F S F L S F F Q N I Q V I D E I L L O

PPR1

*A.thaliana* 88 S F V P R P R S L P R I V Y S S L N Y C L O S S D P L L S F A I L Q R L R S G C L P N O T H L L S D A W L E R R - R G S Q S V A D I N E M K L I G Y P D T C N C N Y L V S S L C A V D K  
*C.rubella* 88 S F V P R P R S L P R I V Y S S L N Y C L O S S D P L L S F A I L Q R L R S G C L P N O T H L L S D A W L E R R - R G S Q S V A D I N E M K L I G Y P D T C N C N Y L V S S L C A V D K  
*B.rapa* 86 S F V P R P R S L P R I V Y S S L N Y C L O S S D P L L S F A I L Q R L R S G C L P N O T H L L S D A W L E R R - R G S Q S V E I N E M K L I G Y P D T C N C N Y L V S S L C A V D K  
*C.sinensis* 88 S F T P R P R S R P K L A Y D L L S Y T L Q S D P L P L A L A I L Q R L R S G C V P V Q T H L L S S A W L E R R - C O S S V A D I L L E M S I G Y P D C C N C N Y L V S S L C A V D K  
*C.raimondii* 88 S F S T R P R S R P R I V D L L S Y T L Q S D P L P L A L A I L Q R L R S G C V P A P Q I L L S S A W L E R R - G H S Q P V S D L E M O D I G F C P S M P C N Y L I S S L C A V D Q  
*P.trichocarpa* 86 S I F P R P R R P R I V Y S S L S Y T L O S N L F S L G L A I L Q R L R S G C V P V Q T H L L S S A W L E R R - R E G O S V G D L L E M S I G Y P D C C N C N Y L V S L C N V D Q  
*F.vesca* 86 S I F P R P R S R Q A Y A Y M L S F L Q S S N P L L Q L A I L Q R L R S G C V P V Q T H L L S S A W L E R R - K E S R S V S D L L E M S I G Y P D C C N C N Y L I S S L C A V D Q  
*P.persica* 88 S F T P R P R S R P K A Y C L P L S Y T L Q S D P L P L A L A I L Q R L R S G C V P V Q T H L L S S A W L E R R - N E S S V K L E M S I G Y P D C C N C N Y L I S S L C A V D Q  
*V.vinifera* 88 S F T P R P R S R P K A Y C L P L S Y T L Q S D P L P L A L A I L Q R L R S G C V P V Q T H L L S S A W L E R R - R O S S V N I L L E M S I G Y P D C C N C N Y L I S S L C A V D Q  
*M.esculenta* 86 S I F P L P R P R P Q V Y S C L S Y T L Q S P S P L P L A L A I L Q R L R S G C V P V Q T H L L S S A W L E R R - R O S H V A N I L L E M S I G Y P A D S G C N Y L V S S L C A V D Q  
*C.sativus* 88 S I S I R P R S R S Q P V H G S L P Y T L Q S P S P L P L A L A I L Q R L R S G C V P S P O T H L L S S A W L E R R - S O A K S V A N I L L E M S I G Y P D C C N C N Y L I S S L C S I G E  
*C.paraya* 88 A E F P R P R S R P L A Y S Y L S H L Q A P S P L P L A L A I L Q R L R S G C V P A P Q I L L S S A W L E R R - R O S H S V N I L L E M S I G Y P D C C N C N Y L I S S L C A V D Q  
*E.grandis* 86 S F V P R P R S R P R A Y S C L L Q S Y T L Q S D P L P L A L A I L Q R L R S G C V P V Q A R L L S S A W L E Q L - S O S R S V A D I L L G M R L L I G Y P S D C C N C N Y L V S S L C A V D Q  
*S.tuberosum* 87 S F T T R P R P R P Q A Y S C L L S Y T L Q S S N P L P L A L A I L Q R L R S G C V P V Q T H L L S A W L E R R - S K S Y S V S I L L E M O D I G Y A P D C C N C Y L I S S L C A V D Q  
*G.max* 78 S I F T P R P R S K A O P T Y S M L S Y T L Q S S N P L P L A L A I L Q R L R S G C V P V Q T H L L S S A W L D Q H - C L S H S V A N I L L Q M S I G Y P D C C N C N Y L I S S L C A V D Q  
*M.truncatula* 99 S F T P R P R P R P Q A Y S M L S Y T L Q S S N P L P L A L A I L Q R L R S G C V P V Q T H L L S S A W L D R R - C L S H S V A N I L L Q M S I G Y P D C C T C N H L I S S L C A V R Q

PPR2

PPR3

*A.thaliana* 187 I D E A I K V V E E M S A G C I P D V E S Y G A V I N S L C L A R K T D V V K I V K E M V S R A G I S P R K G M L T K V A A L R A N R E I W K A I E M I E F V E S R D Y P V F E S Y E L V V E G  
*C.rubella* 187 I D E A I K V V E E M S A G C I P D V E S Y G A V I N S L C L A R K T D V V N I V K E M V S R A R I S P R K G M L T K V A A L R A N R E I W K A I E M I E F V E S R G Y P V F E S Y E L V V E G  
*B.rapa* 186 I D E A V R V V E E M S A G C I P D V E S Y G A V I S S N C L A R K T S D V V K I V K E M V S R A G I S P R K G M L T K V A A L R A N R E I W K A I E M I E F V E S R D Y P V F E S Y E L V V E G  
*C.sinensis* 187 I D E A R K V L K G M S A G C V P D L E S Y I V I G A M S T A R K L N D A V E M L K E M V I N M G L M P R O G V I V K V A A L R A N R E I W K A I E M I E F L E R K G Q P P G E V V V E G  
*P.trichocarpa* 183 I D E A V K L K G M S A G C V P D L E S Y I V I G A M S T A R K L N D A V E M L K E M V I N M G L M P R O G V I V K V A A L R A N R E I W K A I E M I E F L E R K G Q P P G E V V V E G  
*F.vesca* 185 I D E A V K V L K G M S A G C V P D L E S Y I V I G A M C V R R K S E L D M O I K R V E S V G L P R O G V I V K V A A L R A N R E I W R A V E H I E F L E R K D Y P V G F E S Y D L V V E G  
*P.persica* 187 I D E A V K L K G M S A G C V P D L E S Y I V I G A M C V R R R A B A I D M I N O M V R V G L P R O G I A K V A A L R A N R E I W R A V E H I E F L E R D Q Y P V G F E S Y E L V V E G  
*V.vinifera* 187 I D E A V H V L K S M G A G C I P D L E G Y G S V I G A M C A M R R T D A T E L M K E M V A R I G L P R O G V I V N L V A A L R A K R E I W K A I E M I E F L E G E D F N G F S Y E L V V E G  
*M.esculenta* 185 I D E A V R V L K G M S A G C V P D L E G Y G S V I G S M C T A R R R A D A V E M L K E M V V K I G L N P R H G V V K I A A L R A N R E I W T A V E H I E F F E R E G C H G F E S Y E L V I E G  
*C.sativus* 187 I D E A F Q V L K G M S A G C I P D L E S Y G L H H A T A V R R D D R A V E L L K E M V V R V L M P R O G T I N V V A A L R N R E V R A V E H I E D L E R D S H D V G F E S Y E L V V E G  
*C.paraya* 187 I D E A R K V L K G M A A G C I P D L E S Y G L H H A T A V R R D D R A V E L L K E M V V R V L M P R O G T I N V V A A L R N R E V R A V E H I E D L E R D S H D V G F E S Y E L V V E G  
*E.grandis* 185 I D E A N E V L K G M T A G C V P D L E S Y I V I G A M C A R R S D A I E M L Q V C R Q L P R O G I V A R M I A R T H A R E I R A V E H I E F L E R E N R G F O S Y E L V E G  
*S.tuberosum* 177 I D E A V N L K G M S A G C S D L D V G S L I D N I S E L R M S A I I K T I N E M V A F G L S P R E Q L V K A A A L L A N E I R A H I E F L E T N E G V H I G E S Y Q S V I E G  
*G.max* 186 I D E A V R V L K G M S A G C I P D S S Y G A V I G A M C V R R K A K A L D L M O M V O Y Q L P Q G G L V K L L A A L R A N R E I W K A I E M I E F L E R E G N S V G F E S Y E L V I E G  
*M.truncatula* 198 I V E A H D V L K G M S A G C I P D S N S Y G V I G A M C V R R R S D A O D L M O M V A R Y G L P D H G M V R I L S A L R A N R E I W K A I E M I E F L E R E G N S V G F E S Y E L V V E G

PPR4

*A.thaliana* 287 C L E V R E Y I L A G K V V I M G M T E R G F I P Y I R V R Q K V V E G L A G G E W K L A C V R Q R F A E L R S  
*C.rubella* 287 C L E V R E Y I L A G K V V I M G M T E R G F I P Y I R V R Q K V V E G L A G G E W K L A C V R Q R F A E L R S  
*B.rapa* 286 C L E V R E Y I L A G K V V I M G M T E R G F I P Y I R V R Q K V V E G L A G G E W K L A C V R Q R F A E L R S  
*C.sinensis* 287 C L E C R E Y I L A G K V V I M G M T E R G F I P Y I R V R Q K V V E G L A G G E W K L A C V R Q R F A E L R S  
*C.raimondii* 287 C L E C E Y V L A G K V V I M G M T E R G F I P Y I R V R Q K V V E G L A G G E W K L A C V R Q R F A E L R S  
*P.trichocarpa* 285 C L E C K D F L A R K V V I M G M T E R G F I P Y I R V R Q K V V E G L A G G E W K L A C V R R R F A E L S S  
*F.vesca* 285 C L D S G S N I L A G K V V I M G M T E R G F V P Y I R T R H K V V E R L A G A G E W K L A N A V R Q R F S E L R S  
*P.persica* 287 C L P C G E Y L A G K V V I M G M T E R G F I P Y I R V R Q K V V E G L A G G E W K L A C V R Q R F A E L R S  
*V.vinifera* 287 C L A C E F V L A G K V V I M G M T E R G F I P Y I R V R Q K V V E G L A G G E W K L A C V R Q R F A E L R S  
*M.esculenta* 285 C L E C S E Y L A G K V V I M G M T E R R F I P Y I R V R Q K V V E G L A G G E W K L A C A V R Q R F F E L S  
*C.sativus* 287 C L E C R E Y I L A G K V V I M G M T E R G F I P Y I R V R Q K V V E G L A G G E W L A S A - - - - -  
*C.paraya* 287 C L E C R E F I L A G K V A T E M T D R G F I P Y I R V R Q K V V E G L A S G E W K L A C A V R Q R F A E L R S  
*E.grandis* 285 C L R C C E H V L A G K V V I M G M T A R G F I P Y I D I R Q K V V E G L A A H G E M D I V A R V R Q R F A E L R S  
*S.tuberosum* 277 C L E S R Q F Y L A G R F V E M T K R G F I P Y I R S R Q K V V E G L T S H G E W K L A N A V R Q R F A E L R S  
*G.max* 286 C L E K R E Y V L A K V A T G M T E R G F I P Y I R V R Q K I E G L A S D E W N L A C A V R Q R F A E L R S  
*M.truncatula* 298 C L E R R E Y V L A G K V A G M T E R G F I P Y I R A R Q I E G L A S D E W N L A C A V R Q R F A E L R S

Supplemental Figure 5 Alignment of MID1 orthologues.

The conserved PPR domains are indicated by black line on the top.

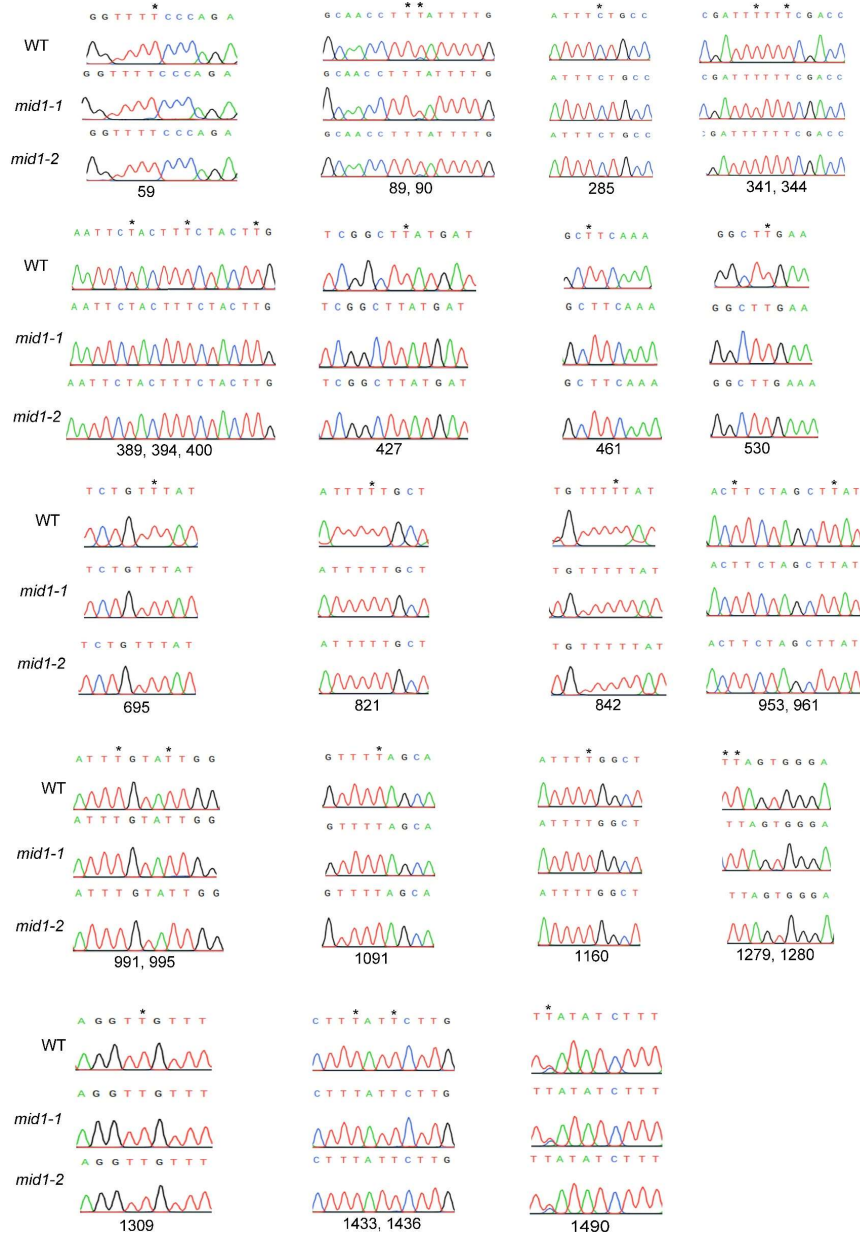

**Supplemental Figure 6** *nad2* editing status in wild-type and *mid1* mutants.

The asterisks indicate the editing sites. The number under the sequence map marks the position of each editing site.



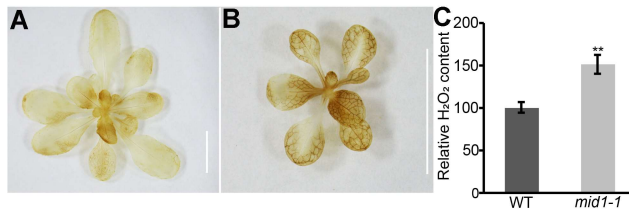

**Supplemental Figure 7** Measurement of H<sub>2</sub>O<sub>2</sub> content in *mid1*

DAB staining detection of H<sub>2</sub>O<sub>2</sub> in 4-week-old wild-type (A) and *mid1-1* plant (B). Bars=1 cm.

(C) Quantitative assay of H<sub>2</sub>O<sub>2</sub> content in (A) and (B), Student's t tests, \*\*P<0.01.

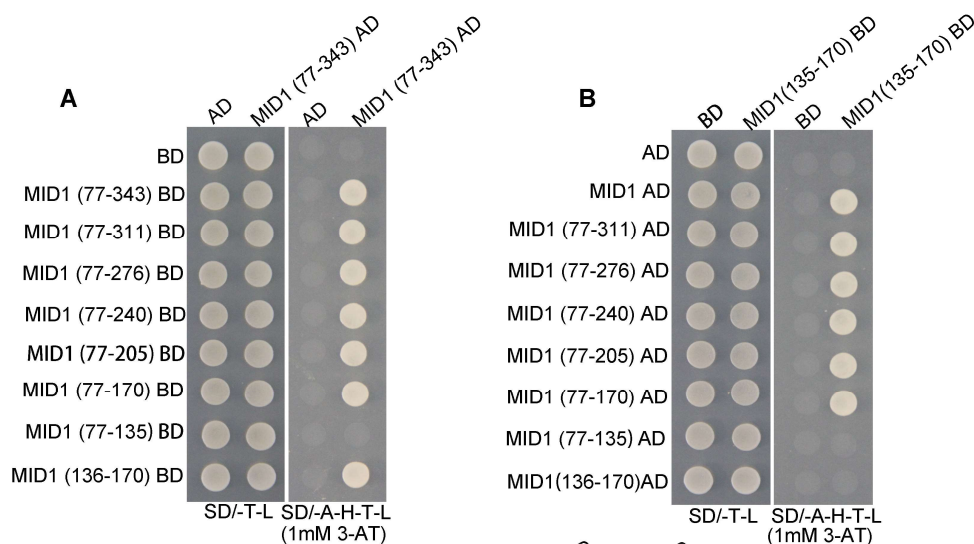

**Supplemental Figure 8** Identification of Domains Necessary for MID1 Homodimer

**(A)** Identification of domains directly mediating the physical interaction during MID1 homodimer formation. 1mM 3-AT was added to inhibit the autoactivation. **(B)** Identification of domains that can facilitate the formation of MID1 homodimer. 1mM 3-AT was added to inhibit the autoactivation.

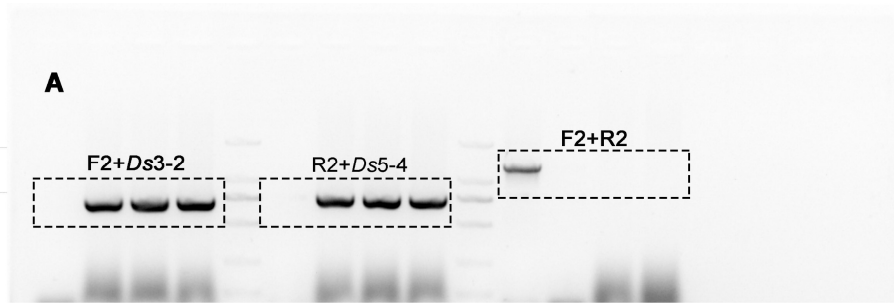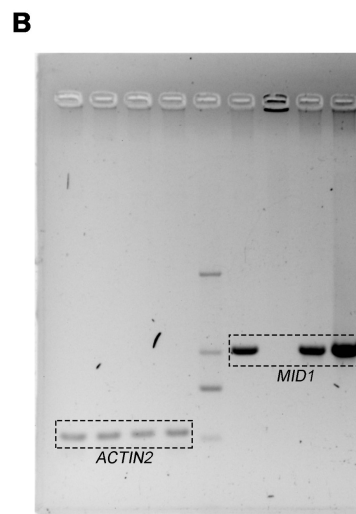

**Supplemental Figure 9** Uncropped image of Figure 3C

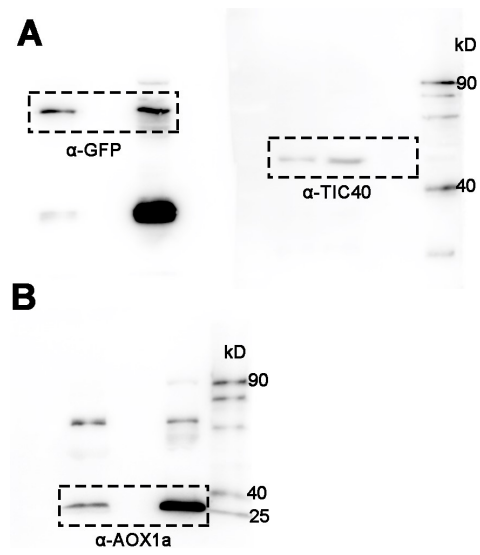

**Supplemental Figure 10** Uncropped image of Figure 4D

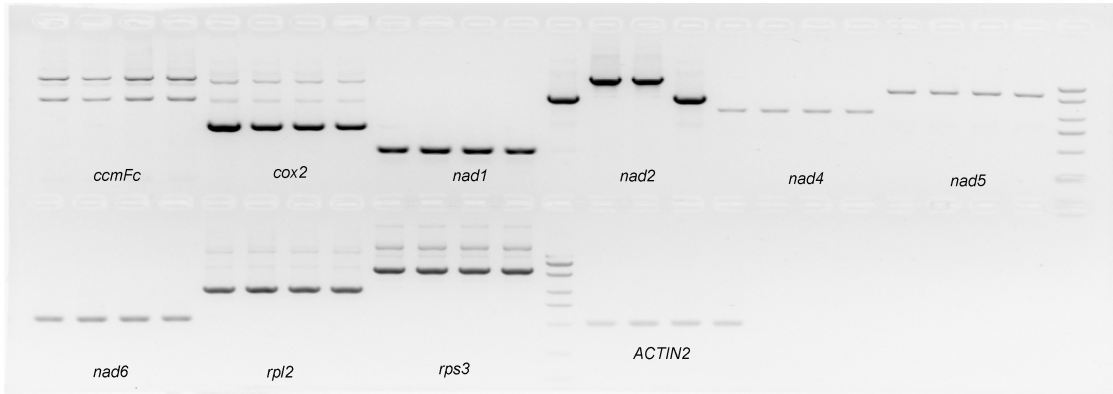

**Supplemental Figure 11** Uncropped image of Figure 5B

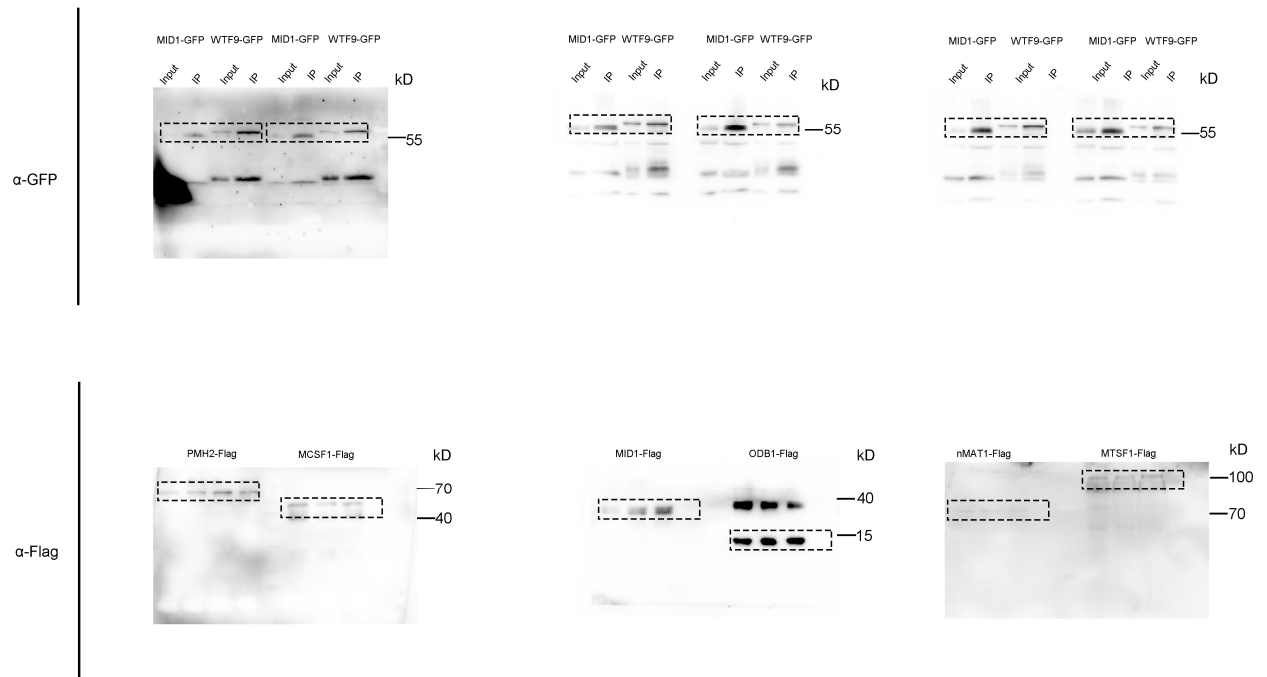

**Supplemental Figure 12** Uncropped image of Figure 6B

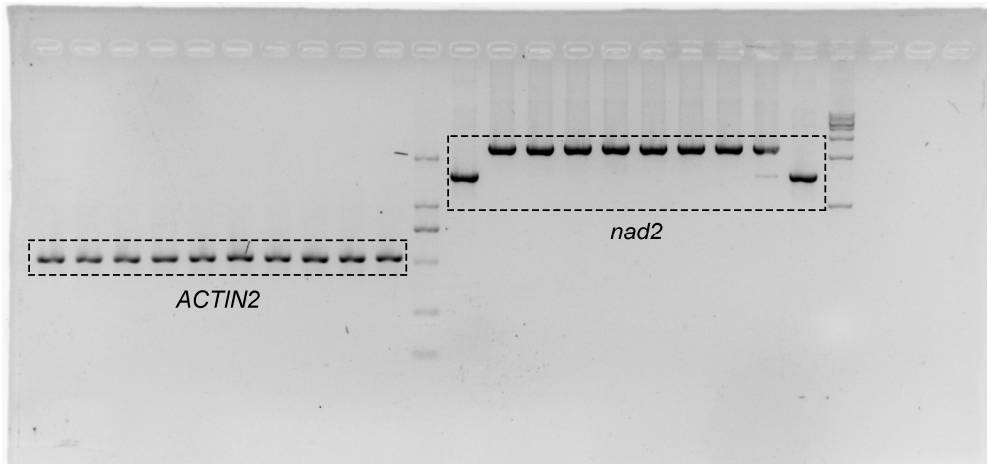

**Supplemental Figure 13** Uncropped image of Figure 7C

Primers for Y2H assay

| Primer name            | Primer sequence (5'-3')                            |
|------------------------|----------------------------------------------------|
| MID1 BD 77aa forward   | ATCTCAGAGGAGGACCTGCATCATAGAATCAGAGTCATTGACG        |
| MID1 BD 136aa forward  | ATCTCAGAGGAGGACCTGCATCAGACTCATCTCCTTCTCTCT         |
| MID1 BD 135aa reverse  | GAATTCGGCCTCCATGGCCATAGGGTTAGGTAGACAGCCAGAACG      |
| MID1 BD 170aa reverse  | GAATTCGGCCTCCATGGCCATATCAGGACTGTATCCAATC           |
| MID1 BD 205aa reverse  | GAATTCGGCCTCCATGGCCATATCAGGAATACAGCCAGCTGCAC       |
| MID1 BD 240aa reverse  | GAATTCGGCCTCCATGGCCATTGGAGAGATCCCAGCTTTGCTCA       |
| MID1 BD 276aa reverse  | GAATTCGGCCTCCATGGCCATCTCCACAGGGTAATCCCGAC          |
| MID1 BD 311aa reverse  | GAATTCGGCCTCCATGGCCATATACGGTATGAACCCTC             |
| MID1 BD 343aa reverse  | GAATTCGGCCTCCATGGCCATAGACCTCAGTTCAGAAACCCTTTG      |
| nMAT1 BD 90aa forward  | ATCTCAGAGGAGGACCTGCATTGGGTCTTAGCTTATCAACGAAC       |
| nMAT1 BD 711aa reverse | GAATTCGGCCTCCATGGCCATTGTTTGTGAGTCTAATTTCTGCAACC    |
| MCSF1 BD 28aa forward  | ATCTCAGAGGAGGACCTGCATTCACGACTCCGAGACCTTTACA        |
| MCSF1 BD 405aa reverse | GAATTCGGCCTCCATGGCCATGGTTGTCTCGTCAGGAGAATCT        |
| MTSF1 BD 43aa forward  | ATCTCAGAGGAGGACCTGCATTCCACTCCTCCGCCGATGACAT        |
| MTSF1 BD 997aa reverse | GAATTCGGCCTCCATGGCCATAGTCCCATCAGATGTTTTCTTTTC      |
| ODB1 BD 47aa forward   | ATCTCAGAGGAGGACCTGCATACTTCAGGAATCAGTAGACCACTC      |
| ODB1 BD 176aa reverse  | GAATTCGGCCTCCATGGCCATCAAAGCATCCTCGTGATAAAGATG      |
| PMH2 BD 26aa forward   | ATCTCAGAGGAGGACCTGCATAAATACTGTTCTGTTTCACAACCTGGC   |
| PMH2 BD 616aa forward  | GAATTCGGCCTCCATGGCCATGTAAGATCTTTTCCCATCATTTGATC    |
| MID1 AD 77aa forward   | GACGTACCAGATTACGCTCATCATAGAATCAGAGTCATTGACG        |
| MID1 AD 136aa forward  | GACGTACCAGATTACGCTCATCAGACTCATCTCCTTCTCTCT         |
| MID1 AD 135aa reverse  | TTCCTGACTGGCCTCCATGGCCATAGGGTTAGGTAGACAGCCAGAACG   |
| MID1 AD 170aa reverse  | TTCCTGACTGGCCTCCATGGCCATATCAGGACTGTATCCAATC        |
| MID1 AD 205aa reverse  | TTCCTGACTGGCCTCCATGGCCATATCAGGAATACAGCCAGCTGCAC    |
| MID1 AD 240aa reverse  | TTCCTGACTGGCCTCCATGGCCATTGGAGAGATCCCAGCTTTGCTCA    |
| MID1 AD 276aa reverse  | TTCCTGACTGGCCTCCATGGCCATCTCCACAGGGTAATCCCGAC       |
| MID1 AD 311aa reverse  | TTCCTGACTGGCCTCCATGGCCATATACGGTATGAACCCTC          |
| MID1 AD 343aa reverse  | TTCCTGACTGGCCTCCATGGCCATAGACCTCAGTTCAGAAACCCTTTG   |
| nMAT1 AD 90aa forward  | GACGTACCAGATTACGCTCATTGGGTCTTAGCTTATCAACGAAC       |
| nMAT1 AD 711aa reverse | TTCCTGACTGGCCTCCATGGCCATTGTTTGTGAGTCTAATTTCTGCAACC |
| MCSF1 AD 28aa forward  | GACGTACCAGATTACGCTCATTCCACTCCGAGACCTTTACA          |
| MCSF1 AD 405aa reverse | TTCCTGACTGGCCTCCATGGCCATGGTTGTCTCGTCAGGAGAATCT     |
| MTSF1 AD 43aa forward  | GACGTACCAGATTACGCTCATTCCACTCCTCCGCCGATGACAT        |
| MTSF1 AD 997aa reverse | TTCCTGACTGGCCTCCATGGCCATAGTCCCATCAGATGTTTTCTTTTC   |
| ODB1 AD 47aa forward   | GACGTACCAGATTACGCTCATACTTCAGGAATCAGTAGACCACTC      |
| ODB1 AD 176aa reverse  | TTCCTGACTGGCCTCCATGGCCATCAAAGCATCCTCGTGATAAAGATG   |
| PMH2 AD 26aa forward   | GACGTACCAGATTACGCTCATAAATACTGTTCTGTTTCACAACCTGGC   |
| PMH2 AD 616aa forward  | TTCCTGACTGGCCTCCATGGCCATGTAAGATCTTTTCCCATCATTTGATC |
| MID1 GFP forward       | ATCGAATTCCTGCAGCCCCGGGATGGCAATTCGCTTGACGCATC       |
| MID1(90aa) GFP reverse | CACCATTCTAGAACTAGTAACAAAACCTTTGGAGGATTTTCGTC       |
| MID1 GFP reverse       | CACCATTCTAGAACTAGTAGACCTCAGTTCAGAAACCCTTTG         |
| WTF9 forward           | ATCGAATTCCTGCAGCCCCGGGATGCTCTCTATTTCGCCCATGCCAA    |

Primers for protoplast transformation



|                                     |                                         |                                                   |                          |
|-------------------------------------|-----------------------------------------|---------------------------------------------------|--------------------------|
|                                     | WTF9 reverse                            | CACCATTCTAGAACTAGTGCCTTCAAAATCCAAATCCAAATC        |                          |
|                                     | nMAT1 Flag forward                      | TCTCTCGAGGTCGACGGTATCGAATGAAAAGACTGACATATCCATTGAG |                          |
|                                     | nMAT1 Flag reverse                      | TTCTGCAGGAATTTCGATATCTGTTTGTGAGTCTAATTTCTGCAACC   |                          |
|                                     | MCSF1 Flag forward                      | TCTCTCGAGGTCGACGGTATCGAATGTTCTTGATTTCGTCTCTCCCGC  |                          |
|                                     | MCSF1 Flag reverse                      | TTCTGCAGGAATTTCGATATCGGTTGTCTCGTCAGGAGAATCT       |                          |
|                                     | MTSF1 Flag forward                      | TCTCTCGAGGTCGACGGTATCGAATGAACAAAACAGTCGTAAGATGTC  |                          |
|                                     | MTSF1 Flag reverse                      | TTCTGCAGGAATTTCGATATCAGTCCCATCAGATGTTTTCTTTTC     |                          |
|                                     | ODB1 Flag forward                       | TCTCTCGAGGTCGACGGTATCGAATGGCGGGGTTAGGGTTA         |                          |
|                                     | ODB1 Flag reverse                       | TTCTGCAGGAATTTCGATATCCAAAGCATCCTCGTGATAAAGATG     |                          |
|                                     | PMH2 Flag forward                       | TCTCTCGAGGTCGACGGTATCGAATGATCACTACAGTGCTACGACG    |                          |
|                                     | PMH2 Flag reverse                       | TTCTGCAGGAATTTCGATATCGTAAGATCTTTTCCCATCATTTGATC   |                          |
| Primers for genetic complementation | MID1 forward                            | GGGGGACTCTAGAGGATCCCCATGGCAATTCGCTTGACGCATC       |                          |
|                                     | MID1 135aa reverse                      | CTCGCCCTTGCTCACGGTACCCAGGGTTAGGTAGACAGCCAGAACG    |                          |
|                                     | MID1 170aa reverse                      | CTCGCCCTTGCTCACGGTACCCATCAGGACTGTATCCAATC         |                          |
|                                     | MID1 205aa reverse                      | CTCGCCCTTGCTCACGGTACCCATCAGGAATACAGCCAGCTGCAC     |                          |
|                                     | MID1 240aa reverse                      | CTCGCCCTTGCTCACGGTACCCTGGAGAGATCCCAGCTTTGCTCA     |                          |
|                                     | MID1 276aa reverse                      | CTCGCCCTTGCTCACGGTACCCCTCCACAGGGTAATCCCCGAC       |                          |
|                                     | MID1 311aa reverse                      | CTCGCCCTTGCTCACGGTACCCATACGGTATGAACCCTC           |                          |
|                                     | MID1 343aa reverse                      | CTCGCCCTTGCTCACGGTACCCAGACCTCAGTTCAGAAACCCTTG     |                          |
|                                     | MID1 $\Delta$ (101-135aa) inter reverse | GAGAGAAGGAGATGAGTCTGAATCTTGGGCAGTGAACGA           |                          |
|                                     | MID1 $\Delta$ (101-135aa) inter forward | TCGTTCACTGCCAAGATTCAGACTCATCTCCTTCTCTC            |                          |
|                                     | MID1 $\Delta$ (136-170aa) inter reverse | AAGTAATTGCAGGTTCCAGTAGGGTTAGGTAGACAGCCAG          |                          |
|                                     | MID1 $\Delta$ (136-170aa) inter forward | CTGGCTGTCTACCTAACCTACTGGAACCTGCAATTACTT           |                          |
|                                     | MID1Pro forward                         | CAGTGCCAAGCTTGCATGCCGTAATAATGTTTGACGG             |                          |
|                                     | MID1Pro reverse                         | TGCGTCAAGCGAATTGCCATTTCTATTCTCAGAGACCTG           |                          |
|                                     | MID1 CDS forward                        | CAGGTCTCTGAGAATAGGAAATGGCAATTCGCTTGACGCA          |                          |
|                                     | MID1 Flag reverse                       | GTCGACAGGCCTTTCGAAAGACCTCAGTTCAGAAACCC            |                          |
|                                     | MID1 GUS reverse                        | TTCGAGCTCGGTACCCGGGGATCCAGACCTCAGTTCAGAAACCC      |                          |
|                                     | Primers for RT-PCR                      | F1                                                | ATGGCAATTCGCTTGACGCATCT  |
|                                     |                                         | R1                                                | CTAAGACCTCAGTTCAGAAACCC  |
|                                     |                                         | F2                                                | CCGGATTATTCCTCCTGGGATTAG |
| R2                                  |                                         | CCAGGATCGTAACTGCAGCTATTC                          |                          |
| ACTIN2 RT forward                   |                                         | ATCCTTCCTGATATCGAC                                |                          |
| ACTIN2 RT reverse                   |                                         | GAGAAGATGACTCAGATC                                |                          |
| <i>ccmFc</i> forward                |                                         | ATTTTTATGGTCGTGCCTTGTGGCA                         |                          |
| <i>ccmFc</i> reverse                |                                         | TGAACTCCACGGAACCTTCTCGATT                         |                          |
| <i>cox2</i> forward                 |                                         | CCTCACAATTTCTCCTTGTGATGC                          |                          |
| <i>cox2</i> reverse                 |                                         | TTCCCCGGTTTGGGGGATTAAT                            |                          |
| <i>rp12</i> forward                 |                                         | TGAGACCAGGGAGAGCAAGAGC                            |                          |
| <i>rp12</i> reverse                 |                                         | ACAGTGAATAAGGGCTTAGGATGG                          |                          |
| <i>rps3</i> forward                 |                                         | ATGGCACGAAAAGGAAATCCG                             |                          |
| <i>rps3</i> reverse                 |                                         | TCGTACGTTTCGGATATAGCAC                            |                          |

Primers for RT-PCR analysis of *nad* transcripts are from [des Francs-Small et al. , 2014](#)

Primers for qRT-PCR

MID1 qRT forward  
MID1 qRT reverse  
ACTIN2 qRT forward  
ACTIN2 qRT reverse

TTTTTCCGGTCAATCTCGTC  
GCAGTGAACGAGGTCTCACA  
ACACTGTGCCAATCTACGAGGGTT  
ACAATTTCCCGCTCTGCTGTTGTG

Primers for luciferase complementation assay

MID1-NLuc forward  
MID1-NLuc reverse  
WTF9-NLuc forward  
WTF9-NLuc reverse  
CLuc-MID1 forward  
CLuc-MID1 reverse  
CLuc-MTSF1 forward  
CLuc-MTSF1 reverse

AGAACACGGGGGACGAGCTCGGTACCATGCATAGAATCAGAGTCATTGACG  
AGTCCATTTGTTGGATCCCGGGTACCAGACCTCAGTTCAGAAACCCTTTGTC  
AGAACACGGGGGACGAGCTCGGTACCATGCACCTTCTTAAGGAAGTTTCCTTCAA  
AGTCCATTTGTTGGATCCCGGGTACCGCCTTCAAAATCCAAATCCAAATCT  
TCTCGTACGCGTCCCGGGGCGGTACCCATAGAATCAGAGTCATTGACG  
AGTCCATTTGTTGGATCCCGGGTACCCTAAGACCTCAGTTCAGAAACCCT  
TCTCGTACGCGTCCCGGGGCGGTACCTCCACTCCTCCGCCGGATGACATGT  
AGTCCATTTGTTGGATCCCGGGTACCCTAAGTCCCATCAGATGTTTTTC
